# Supplementary material
Source: PubMed Central journal article supplement (PMC2722279)
Supplement: 0902281106_ST1_PDF.pdf [file 0902281106_ST1_PDF.pdf]

Supplemental Table S1. List of oligodeoxynucleotides used for preparation of damaged

## DNA probes.

| Oligos                | Sequence and modification                                                                    |
|-----------------------|----------------------------------------------------------------------------------------------|
| Oligo 1               | 5'-CCT TAA GCT TCC TCA ACC ACT TAC CAT ACT CGA GAT T-3' (37mer)                              |
| TMR-oligo 1           | 5'-/TAMRA/CCT TAA GCT TCC TCA ACC ACT TAC CAT ACT CGA GAT T-3' (37mer)                       |
| TMR-oligo 1A          | 5'-/TAMRA/TTAC CAT ACT CGA GAT T-3' (17mer)                                                  |
| TMR-oligo 1B          | 5'-/TAMRA/CC TCA ACC ACT TAC CAT ACT CGA GAT T-3' (27mer)                                    |
| TMR-oligo 1C          | 5'-/TAMRA/TAA ACA AAT GAT TTT CCT TAA GCT TCC TCA ACC ACT TAC CAT ACT CGA GAT T -3' (52mer)  |
| Oligo 2               | 5'-/Phosphorylation/GAG TAT GGT AAG TGG TTG AGG AAG CTT AAG G-3' (31mer)                     |
| Oligo 2A              | 5'-/Phosphorylation/GAG TAT GGT AA-3' (11mer)                                                |
| Oligo 2B              | 5'-/Phosphorylation/GAG TAT GGT AAG TGG TTG AGG -3' (21mer)                                  |
| Oligo 2C              | 5'-/Phosphorylation/GAG TAT GGT AAG TGG TTG AGG AAG CTTAAG GAA AAT CAT TTG TTT A -3' (46mer) |
| Oligo 3               | 5'-/Phosphorylation/CCC ATT ATG CAT AAC C -3' (16mer)                                        |
| (+)-trans-BPDE-16 mer | 5'-/Phosphorylation/CCC ATT AT/(+)-trans-BPDE-G/ CAT AAC C -3' (16mer)                       |
| (-)-trans-BPDE-16 mer | 5'-/Phosphorylation/CCC ATT AT/(-)-trans-BPDE-G/ CAT AAC C -3' (16mer)                       |
| Int-FAM-oligo 3       | 5'-/Phosphorylation/CCC ATT A/int fluorescein T/G CAT AAC C -3' (16mer)                      |
| Int-TMR-oligo 3       | 5'-/Phosphorylation/CCC ATT A/int TAMRA T/G CAT AAC C -3' (16mer)                            |
| Oligo 4               | 5'-/Phosphorylation/CAT ATG ACG GTT ATG CAT AAT GGG AAT CTC-3' (30mer)                       |
| Bubble-oligo 4        | 5'-/Phosphorylation/CAT ATG ACG GTT <b>TCT TTC</b> AAT GGG AAT CTC-3' (30mer)                |
| Oligo 5               | 5'-/Phosphorylation/GTC ATA TGC CGC CTC TGA CCT TCC TAG AAT TCC ATC C-3' (37mer)             |
| Oligo 5A              | 5'-/Phosphorylation/GTC ATA TGC CGC CTC TG-3' (17mer)                                        |
| Oligo 6               | 5'-GGA TGG AAT TCT AGG AAG GTC AGA GGC GG-3' (29mer)                                         |
| FAM-oligo 6           | 5'-/FAM/GGA TGG AAT TCT AGG AAG GTC AGAGGC GG-3' (29mer)                                     |
| Oligo 6A              | 5'-CAG AGG CGG-3' (9mer)                                                                     |
| FAM-oligo 6A          | 5'-/FAM/CAG AGG CGG-3' (9mer)                                                                |
