# Supplementary material
Source: PubMed Central journal article supplement (PMC2722279)
Supplement: 0902281106_ST2_PDF.pdf [file 0902281106_ST2_PDF.pdf]

Supplemental Table S2. List of damaged DNA probes prepared from ligation of synthesized

## DNA fragments

| Damaged DNA probes                                        | Ligation of DNA fragments                                                                       |
|-----------------------------------------------------------|-------------------------------------------------------------------------------------------------|
| Ligation of oligos                                        | $\begin{array}{ccc} 1 & 3 & 5 \\ \hline 2 & 4 & 6 \end{array}$                                  |
| 5'TMR-ds90mer                                             | 1- TMR-oligo 1, 2- Oligo 2, 3- Oligo 3, 4- Oligo 4, 5- Oligo 5, 6- Oligo 6                      |
| 5'TMR-25 <sup>th</sup> (-)-trans-BPDE-ds50mer             | 1- TMR-oligo 1A, 2- Oligo 2A, 3- (-)-trans-BPDE-16mer, 4- Oligo 4, 5- Oligo 5A, 6- Oligo 6A     |
| 5'TMR-26 <sup>th</sup> (-)-trans-BPDE-ds70mer             | 1- TMR-oligo 1A, 2- Oligo 2A, 3- (-)-trans-BPDE-16mer, 4- Oligo 4, 5- Oligo 5, 6- Oligo 6       |
| 5'TMR-36 <sup>th</sup> (-)-trans-BPDE-ds80mer             | 1- TMR-oligo 1B, 2- Oligo 2B, 3- (-)-trans-BPDE-16mer, 4- Oligo 4, 5- Oligo 5, 6- Oligo 6       |
| 5'TMR-46 <sup>th</sup> (-)-trans-BPDE-ds90mer             | 1- TMR-oligo 1, 2- Oligo 2, 3- (-)-trans-BPDE-16mer, 4- Oligo 4, 5- Oligo 5, 6- Oligo 6         |
| 5'TMR-61 <sup>th</sup> (-)-trans-BPDE-ds105mer            | 1- TMR-oligo 1C, 2- Oligo 2C, 3- (-)-trans-BPDE-16mer, 4- Oligo 4, 5- Oligo 5, 6- Oligo 6       |
| 5'TMR-46 <sup>th</sup> (+)-trans-BPDE- ds 90mer           | 1- TMR-oligo 1, 2- Oligo 2, 3- (+)-trans-BPDE-16mer, 4- Oligo 4, 5- Oligo 5, 6- Oligo 6         |
| 45 <sup>th</sup> -intTMR-ds90mer                          | 1- Oligo 1, 2- Oligo 2, 3- intTMR-oligo 3, 4- Oligo 4, 5- Oligo 5, 6- Oligo 6                   |
| 5'TMR-25 <sup>th</sup> intFAM-ds70mer                     | 1- TMR-oligo 1A, 2- Oligo 2A, 3- intFAM-oligo 3, 4- Oligo 4, 5- Oligo 5, 6- Oligo 6             |
| 5'TMR-35 <sup>th</sup> intFAM-ds80mer                     | 1- TMR-oligo 1B, 2- Oligo 2B, 3- intFAM-oligo 3, 4- Oligo 4, 5- Oligo 5, 6- Oligo 6             |
| 5'TMR-45 <sup>th</sup> intFAM-ds90mer                     | 1- TMR-oligo 1, 2- Oligo 2, 3- intFAM-oligo 3, 4- Oligo 4, 5- Oligo 5, 6- Oligo 6               |
| 5'TMR-60 <sup>th</sup> intFAM-ds105mer                    | 1- TMR-oligo 1C, 2- Oligo 2C, 3- intFAM-oligo 3, 4- Oligo 4, 5- Oligo 5, 6- Oligo 6             |
| 5'TMR-bubble-45 <sup>th</sup> FAM-ds90mer (6 base bubble) | 1- TMR-oligo 1, 2- Oligo 2, 3- intFAM-oligo 3, 4- Bubble-oligo 4, 5- Oligo 5, 6- Oligo 6        |
| FRET-45 <sup>th</sup> (-)-trans-BPDE-ds90mer              | 1- TMR-oligo 1, 2- Oligo 2, 3- (-)-trans-BPDE-16mer, 4- Oligo 4, 5- Oligo 5, 6- FAM-Oligo 6     |
| FRET-25 <sup>th</sup> (-)-trans-BPDE-ds50mer              | 1- TMR-oligo 1A, 2- Oligo 2A, 3- (-)-trans-BPDE-16mer, 4- Oligo 4, 5- Oligo 5A, 6- FAM-Oligo 6A |
| 5'TMR-GAP-ds90mer                                         | $\begin{array}{ccc} 1 & & 5 \\ \hline 2 & 4 & 6 \end{array}$                                    |
