# Supplementary material
Source: PubMed Central journal article supplement (PMC2722279)
Supplement: 0902281106_ST3_PDF.pdf [file 0902281106_ST3_PDF.pdf]

Supplemental Table S3. Summary of measured fluorescence polarization values of UvrAB complexes.

| Damaged oligonucleotides (ds)                            | Fluorescence polarization value of labeled TMR |               |               |               |
|----------------------------------------------------------|------------------------------------------------|---------------|---------------|---------------|
|                                                          | Oligonucleotide probe (ds)                     | UvrA complex  | UvrAB complex | UvrB complex  |
| 5'TMR-45 <sup>th</sup> (+)trans-BPDE-ds90mer             | --                                             | 0.230 ± 0.015 | 0.345 ± 0.020 | 0.333 ± 0.002 |
| 5'TMR-45 <sup>th</sup> (-)trans-BPDE-ds90mer             | 0.237 ± 0.013                                  | 0.237 ± 0.013 | 0.364 ± 0.012 | 0.357 ± 0.007 |
| 5'TMR-35 <sup>th</sup> (-)trans-BPDE-ds80mer             | 0.231 ± 0.007                                  | 0.232 ± 0.007 | 0.343 ± 0.016 | 0.359 ± 0.010 |
| 5'TMR-60 <sup>th</sup> (-)trans-BPDE-ds105mer            | 0.196 ± 0.008                                  | 0.208 ± 0.008 | 0.207 ± 0.015 | 0.200 ± 0.005 |
| 5'TMR-60 <sup>th</sup> FAM-ds105mer                      | 0.180 ± 0.017                                  | 0.223 ± 0.008 | 0.275 ± 0.033 | 0.166 ± 0.019 |
| 5'TMR-Bubble-45 <sup>th</sup> FAM-ds90mer (6bp unpaired) | 0.166 ± 0.002                                  | 0.199 ± 0.002 | 0.250 ± 0.016 | 0.210 ± 0.006 |
| 5'TMR-45 <sup>th</sup> FAM-ds90mer                       | 0.220 ± 0.009                                  | 0.218 ± 0.004 | 0.351         | 0.349 ± 0.016 |
| 5'TMR-35 <sup>th</sup> FAM-ds80mer                       | 0.211 ± 0.015                                  | 0.204 ± 0.005 | 0.337 ± 0.006 | 0.305 ± 0.009 |
| 5'TMR-25 <sup>th</sup> FAM-ds70mer                       | 0.211 ± 0.010                                  | 0.225 ± 0.010 | 0.233 ± 0.005 | 0.216 ± 0.010 |
| 45 <sup>th</sup> intTMR-ds90mer                          | 0.273 ± 0.016                                  | 0.365 ± 0.022 | 0.372 ± 0.014 | 0.370 ± 0.013 |
| 5'TMR-GAP-ds90mer                                        | 0.218 ± 0.011                                  | 0.206 ± 0.005 | 0.344 ± 0.008 | 0.366 ± 0.007 |

Values represent mean ± standard deviation from at least 3 replicate measurements (n ≥ 3)
