# Supplementary material
Source: PubMed Central journal article supplement (PMC2722279)
Supplement: 0902281106_ST4_PDF.pdf [file 0902281106_ST4_PDF.pdf]

Supplemental Table S4. Results obtained from time-resolved fluorescence life-time analysis of the damage probes and their binding to UvrAB

| Oligo          | UvrA                | UvrB                | Time-resolved<br><math>\langle \tau \rangle</math> (ns) | P (Steady state) |
|----------------|---------------------|---------------------|---------------------------------------------------------|------------------|
| TMR-ds90mer    | -                   | -                   | 2.033                                                   | N/A              |
| TMR-BP-ds90mer | -                   | -                   | 2.044                                                   | 0.239            |
| TMR-BP-ds90mer | <i>E.coli</i>       | -                   | 2.062                                                   | 0.237            |
| TMR-BP-ds90mer | <i>E.coli</i>       | <i>E.coli</i>       | 2.212                                                   | 0.360            |
| TMR-BP-ds90mer | <i>E.coli</i>       | <i>B.caldotenax</i> | 2.451                                                   | 0.384            |
| TMR-BP-ds90mer | <i>B.caldotenax</i> | -                   | 2.036                                                   | 0.237            |
| TMR-BP-ds90mer | <i>B.caldotenax</i> | <i>B.caldotenax</i> | 2.044                                                   | 0.235            |
